# Supplementary material for: A novel asymmetrical anti-HER2/CD3 bispecific antibody exhibits potent cytotoxicity for HER2-positive tumor cells
Source: PubMed Central journal article supplement (PMC6694677; doi:10.1186/s13046-019-1354-1), 2019-08-14
Supplement: 13046_2019_1354_MOESM1_ESM.pdf [file 13046_2019_1354_MOESM1_ESM.pdf]

# Supplementary Figure S1. The expression level of HER2

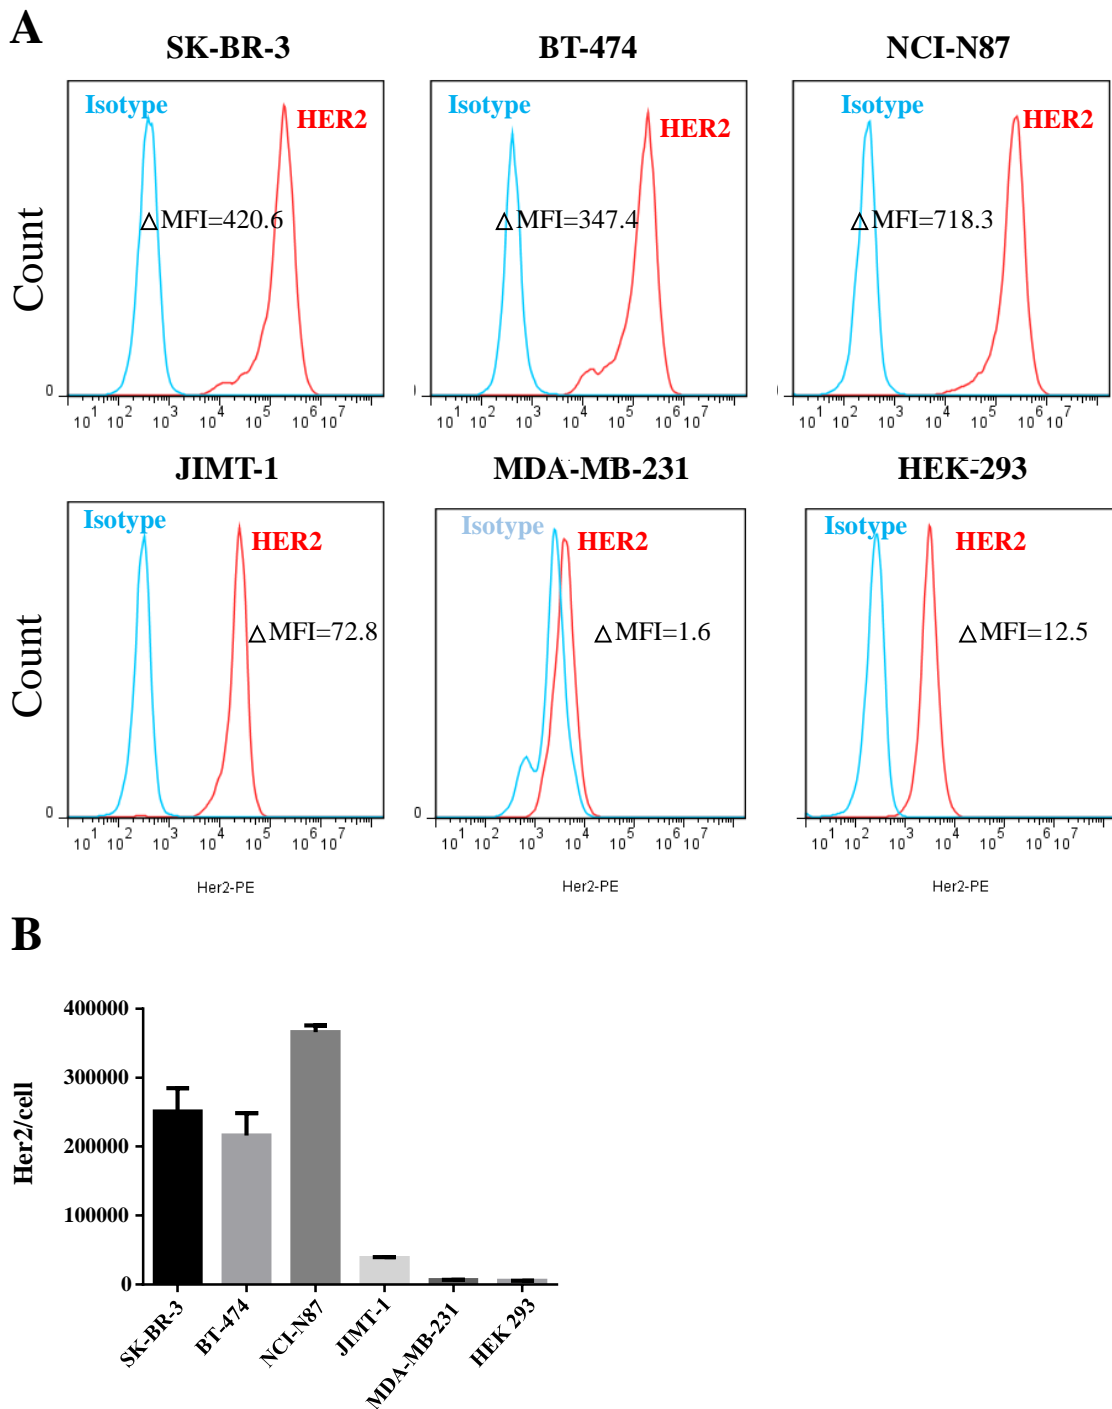

## Supplementary Figure S1. The expression level of HER2 on cell surface.

We used PE-labeled anti-human HER2 fluorescent antibody and Quantibrite™ Beads PE Fluorescence Quantitation Kit (BD) detected the expression level of HER2 on different cells surface according to the manufacture's protocol. (A) Mean fluorescence intensity (MFI) of HER2 and isotype on different cells were calculated by FlowJo software (Version 7.6). (B) Number of HER2 molecules on per cell surface.  $\Delta\text{MFI} = \text{MFI (HER2)} / \text{MFI (isotype)}$ .

# Supplementary Figure S2. The flow cytometry figures of apoptosis

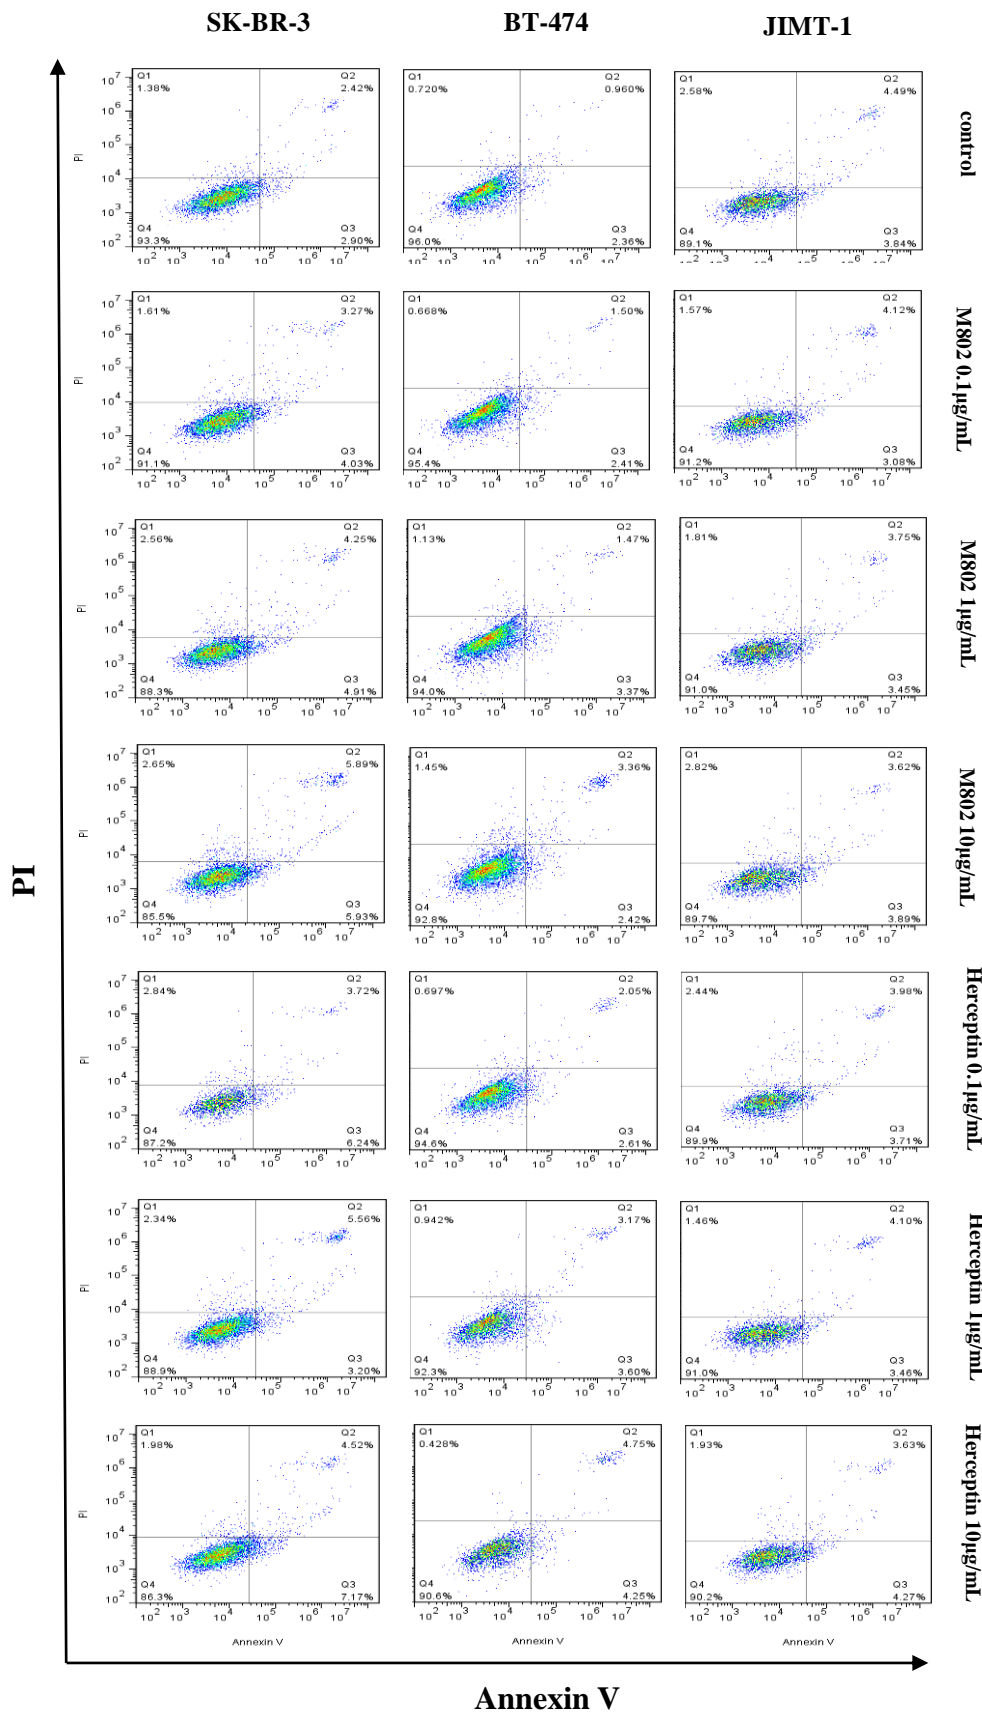

## Supplementary Figure S2. The flow cytometry figures of apoptosis.

SK-BR-3 cells, BT-474 cells and JIMT-1 cells were treated with M802 (0.1, 1, 10µg/mL) and Herceptin (0.1, 1, 10µg/mL) for 48 hours, respectively. Collected cells were stained with Annexin V/PI and detected by flow cytometry.

## Supplementary Figure S3. The quality test results of M806

**A**

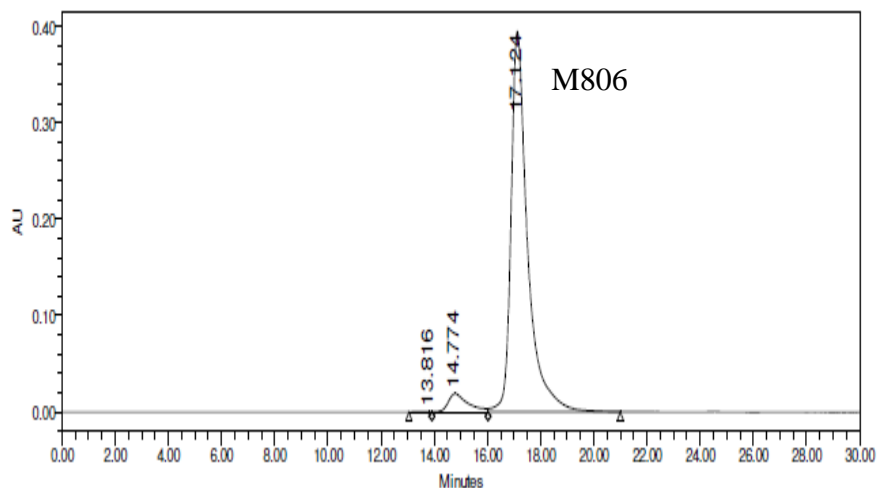

**B**

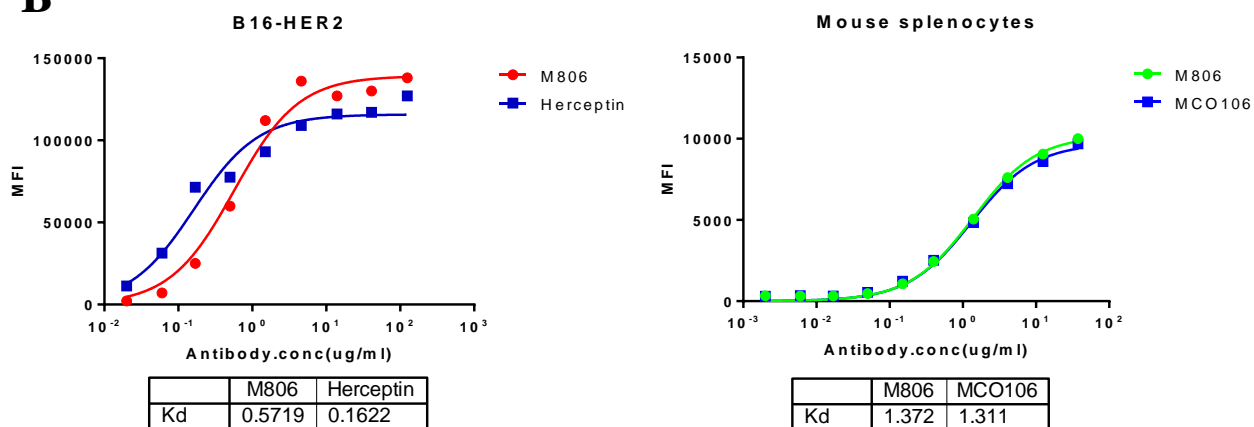

**C**

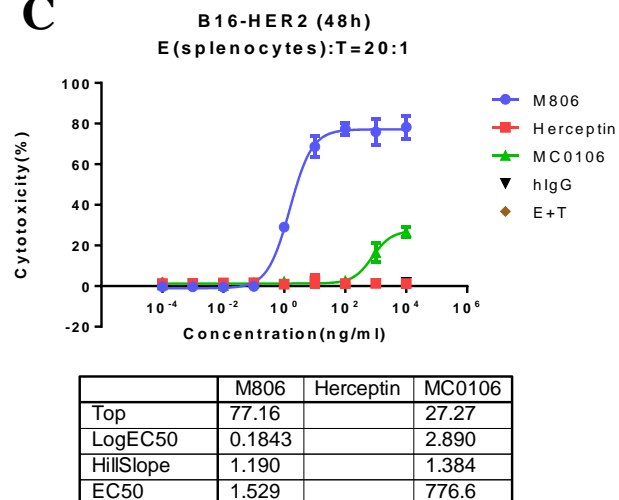

## Supplementary Figure S2. The quality test results of M806.

(A) The purity of M806 was 94.51%. (B) The cell binding activity of M806 on anti-HER2 end and anti-CD3 end. (C) M806 efficiently induced effector cells (mouse splenocytes) to kill target cells (B16-HER2 cells) in vitro.

## Supplementary Figure S4. The changes of lymphocytes *in vivo*

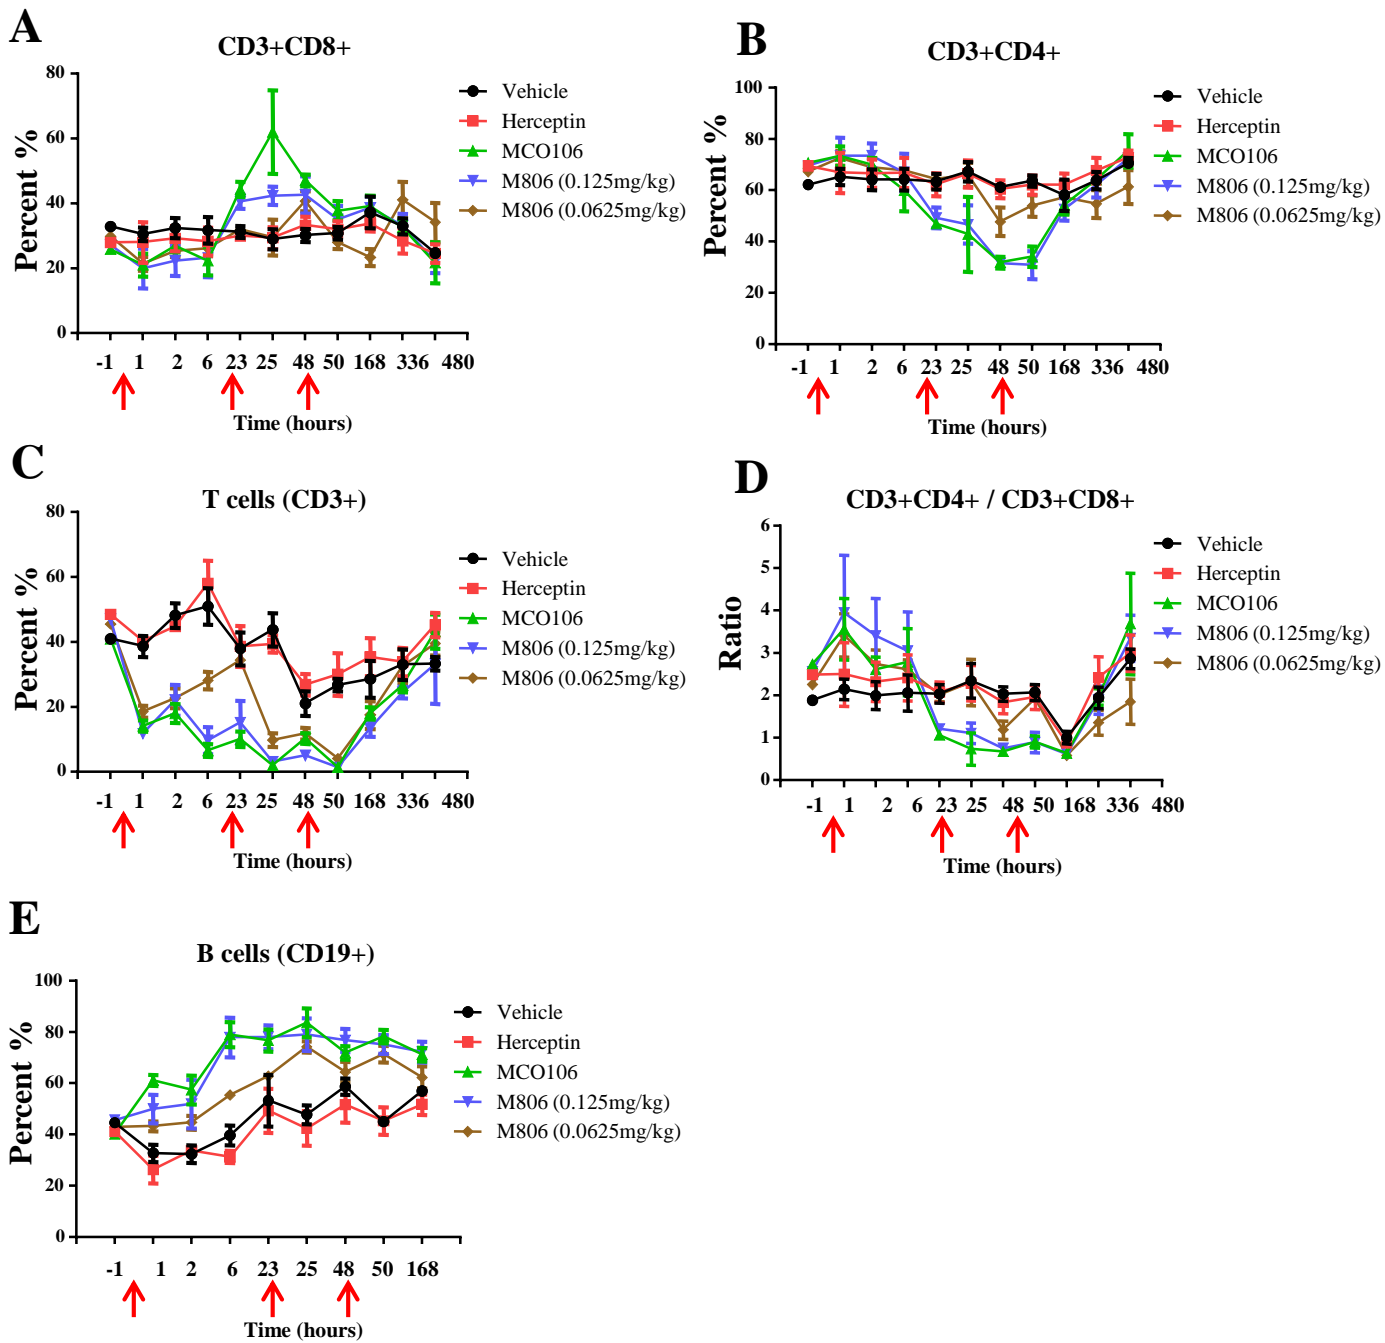

## Supplementary Figure S3. The changes of lymphocytes in peripheral blood.

Before and after administration of antibodies, we extracted the peripheral blood of mice to detect changes of lymphocytes. (A) Percentage of CD3+CD8+ cells/lymphocytes (B) Percentage of CD3+CD4+ cells/lymphocytes (C) Percentage of T cells (CD3+)/lymphocytes (D) The ratio of CD3+CD4+ cells/ CD3+CD8+ cells (E) Percentage of B cells (CD19+)/lymphocytes. Arrow: time points of administration.

## Supplementary Table S1. Primers used for construction of the BsAb

| Primer    | Sequence                                               | Note                        |
|-----------|--------------------------------------------------------|-----------------------------|
| Leader1-F | CGCGAATTC <u>GATATC</u> GCCACCATGGAGACAGACACACTCCTGCTA | Leader peptide-1 5'         |
| Leader1-R | CTGTGGAACCTGGAACCCAGAGCAGCAGCACCCATAGCAGGAGTGTGTCT     | Leader peptide-1 3'         |
| Leader2-F | CGCGAATTC <u>GATATC</u> GCCACCATGGAAACGGATACGCTACTCCTC | Leader peptide-2 5'         |
| Leader2-R | CCGTCGACCCGGGCACCCATAGCAGCAGCACCCAGAGGAGTAGCGTATCC     | Leader peptide-2 3'         |
| Fc-F      | GGT <u>GCGGCCGC</u> CAGAGCCCAAATCTTGTGACAAAAC          | Human IgG1 Fc 5'            |
| Fc-R      | GCGTCTAGAC <u>CTCGAGT</u> CATTTACCCGGAGACAGGGAGAGGC    | Human IgG1 Fc 3'            |
| HerVH-F   | ATGGGTGCCCGGGTCGACGGGGGAAGTGCAGCTGGTGGAAAGCG           | Herceptin heavy chain VH 5' |
| HerVL-F   | CTGGGTTCACAGGTTCACAGGTGATATTCAGATGACCCAGAGCC           | Herceptin light chain VL 5' |
| CK-F      | TAAACGCACCGTGGCGGGCCGAGC                               | Human Ig kappa chain CL 5'  |
| CK-R      | CGAGCTCGGATCCTTAGCATTCGCCGCGGTT                        | Human Ig kappa chain CL 3'  |
| L2KVH-F   | ATGGGTGCCCGGGTCGACGGGGATATCAAAGTGCAGCAGTCAG            | L2K VH 5'                   |
| L2KVH-R   | GCCTGAACCGCCGCTCCTGAGGAGACTGTGAGAGTG                   | L2K VH 3'                   |
| L2KVL-F   | AGTGGTGGAGGAGGTTCTGACATTCAGCTGACCCAGTCTC               | L2K VL 5'                   |
| L2KVL-R   | GGGCTCTGCGGCCGCACCTTTCAGCTCCAGCTTGGTC                  | L2K VL 3'                   |
| Linker-F  | GGAGGCGGCGGTTTCAGGCGGAGGTGGAAGTGGTGGAGGAGGTTCT         | Soft linker 5'              |
| Linker-R  | AGAACCTCCTCCACCACTTCCACCTCCGCTGAACCGCCGCTCC            | Soft linker 3'              |
| T366W-F   | ACCAGGTCAGCCTGTGGTGCCTGGTCAA                           | Fc/T366W 5'                 |
| T366W-R   | TTTGACCAGGCACCACAGGCTGACCTGGT                          | Fc/T366W 3'                 |
| L368R-F   | GTCAGCCTGACCTGCCGGGTCAAAGGCTTCTAT                      | Fc/L368R 5'                 |
| L368R-R   | ATAGAAGCCTTTGACCCGGCAGGTCAGGCTGAC                      | Fc/L368R 3'                 |
| K392D-F   | GGAGAACAACCTACGATACCACGCCTCCCGT                        | Fc/K392D 5'                 |
| K392D-R   | ACGGGAGGCGTGGTATCGTAGTTGTCTCC                          | Fc/K392D 3'                 |
| D399K-F   | CGCCTCCCGTGCTGAAGTCCGACGGCTCCTTC                       | Fc/D399K 5'                 |
| D399K-R   | GAAGGAGCCGTCGGACTTCAGCACGGGAGGCG                       | Fc/D399K 3'                 |
| Y407A-F   | TCCTTCTTCCCTCGCCAGCAAGCTCACCGT                         | Fc/Y407A 5'                 |
| Y407A-R   | ACGGTGAGCTTGCTGGCGAGGAAGAAGGA                          | Fc/Y407A 3'                 |
| K409D-F   | CTTCTCTACAGCGATCTCACCGTGGACA                           | Fc/K409D 5'                 |
| K409D-R   | TGTCCACGGTGAGATCGCTGTAGAGGAAG                          | Fc/K409D 3'                 |

*The restriction endonuclease sites are underlined.*

**Supplementary Table S2.** Thermal challenge assay of BsAb

|           | $T_{50-HER2}(^{\circ}C)$ | $T_{50-CD3}(^{\circ}C)$ |
|-----------|--------------------------|-------------------------|
| Herceptin | 61.26                    | N/A                     |
| M802      | 60.71                    | 57.21                   |
| L2K       | N/A                      | 59.95                   |

*Data was analyzed with Graphpad prism 6 to calculate the temperature ( $T_{50}$ ) at which 50% of antibodies retained binding to cells following thermal challenge. The  $T_{50-HER2}$  referred to antibodies binding to SK-BR-3 cells, and the  $T_{50-CD3}$  referred to antibodies binding to Jurkat cells.*

### Supplementary Table S3. Affinity measurements of antibodies

|                                | $k_a$ , 1/Ms                    | $k_d$ , 1/s                    | $KD$ , M                       |
|--------------------------------|---------------------------------|--------------------------------|--------------------------------|
| M802 and HER2 interaction      | $(4.29 \pm 0.17) \text{ E}+05$  | $(2.48 \pm 0.15) \text{ E}-04$ | $(5.78 \pm 0.12) \text{ E}-10$ |
| Herceptin and HER2 interaction | $(1.12 \pm 0.035) \text{ E}+06$ | $(1.27 \pm 0.23) \text{ E}-04$ | $(1.14 \pm 0.23) \text{ E}-10$ |
| M802 and CD3 interaction       | $(3.45 \pm 0.191) \text{ E}+05$ | $(2.45 \pm 0.18) \text{ E}-02$ | $(7.12 \pm 0.91) \text{ E}-08$ |
| L2K and CD3 interaction        | $(1.07 \pm 0.072) \text{ E}+07$ | $(1.31 \pm 0.19) \text{ E}-02$ | $(1.23 \pm 0.18) \text{ E}-09$ |

*The association rate constant ( $k_a$ ) and the dissociation rate constant ( $k_d$ ) were measured with PriteOn. The equilibrium dissociation constant  $KD$  was calculated as  $KD = Kd/Ka$ .*
